# Supplementary material for: Relationship between diabetic nephropathy and depression: a cross-sectional analysis using the Diabetes Study from the Center of Tokyo Women's Medical University (DIACET)
Source: PubMed Central journal article supplement — BMJ Open Diabetes Res Care. 2016 Dec 15;4(1):e000310. doi: 10.1136/bmjdrc-2016-000310 (PMC5179608; doi:10.1136/bmjdrc-2016-000310), 2016-12-15
Supplement: bmjdrc-2016-000310supp_table.pdf [file bmjdrc-2016-000310supp_table.pdf]

Supplementary Table 1. Area under the receiver operator characteristic curves (AUROC) in three models including either albuminuria or eGFR, or both albuminuria and eGFR parameters to predict depression severity defined as PHQ-9 scores  $\geq 5$  and 10

| Renal parameter             | PHQ-9 scores $\geq 5$ |               |          | PHQ-9 scores $\geq 10$ |               |          |
|-----------------------------|-----------------------|---------------|----------|------------------------|---------------|----------|
|                             | AUROC                 | 95% CI        | P value* | AUROC                  | 95% CI        | P value* |
| <b>Albuminuria</b>          | 0.574                 | 0.546 – 0.601 | -        | 0.573                  | 0.532 – 0.614 | -        |
| <b>eGFR</b>                 | 0.518                 | 0.489 – 0.546 | <0.001   | 0.510                  | 0.467 – 0.554 | 0.001    |
| <b>Albuminuria and eGFR</b> | 0.580                 | 0.552 – 0.610 | 0.262    | 0.573                  | 0.531 – 0.614 | 0.989    |

Abbreviations: PHQ-9: Patient Health Questionnaire-9, AUROC: Area under the receiver operator characteristic curves, eGFR: estimated glomerular filtration ratio
